# Supplementary material for: Processing and characterization of ZnO nanowire-grown PBO fibers with simultaneously enhanced interfacial and atomic oxygen resistance properties
Source: Royal Society of Chemistry journal article supplement (doi:10.1039/c4ra06468b), 2014-11-06
Supplement: c4ra06468b1.pdf [file c4ra06468b1.pdf]

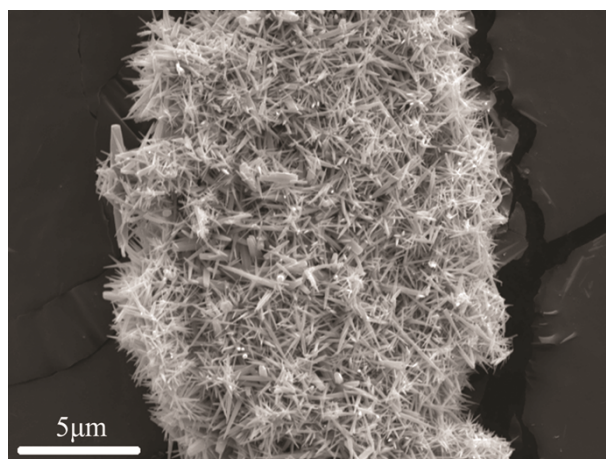

**Figure S1.** SEM image of ZnO NWs-grown PBO fiber without cleaning

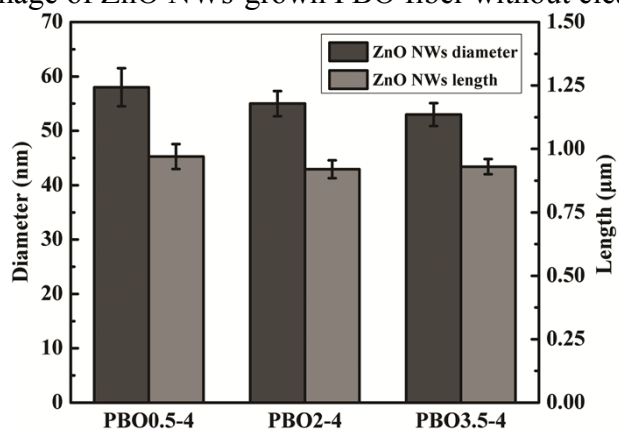

**Figure S2.** Effect of [S]/[G] ratio on the dimension of ZnO NWs.

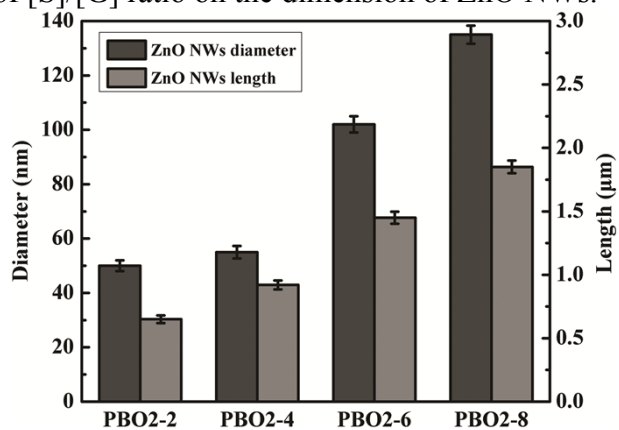

**Figure S3.** Effect of growth time on the dimension of ZnO NWs.
